## Effect of dapagliflozin on cardiovascular outcomes in patients with type 2 diabetes according to baseline renal function and albuminuria status: Insights from DECLARE-TIMI 58

T.A. Zelniker<sup>1</sup>, I. Raz<sup>2</sup>, O. Mosenson<sup>2</sup>, J.P. Dwyer<sup>3</sup>, H.J.L. Heerspink<sup>4</sup>, A. Cahn<sup>2</sup>, K. Im<sup>1</sup>, D.L. Bhatt<sup>1</sup>, L.A. Leiter<sup>5</sup>, D.K. McGuire<sup>6</sup>, J.P.H. Wilding<sup>7</sup>, I.A.M. Gause-Nilsson<sup>8</sup>, A.M. Langkilde<sup>8</sup>, M.S. Sabatine<sup>1</sup>, S.D. Wiviott<sup>1</sup>

<sup>1</sup>TIMI Study Group, Brigham and Women's Hospital and Harvard Medical School, Boston, United States of America; <sup>2</sup>Hadassah University Medical Center, Jerusalem, Israel; <sup>3</sup>Vanderbilt University, Nashville, United States of America; <sup>4</sup>University Medical Center Groningen, Groningen, Netherlands (The); <sup>5</sup>University of Toronto, Toronto, Canada; <sup>6</sup>University of Texas Southwestern Medical School, Dallas, United States of America; <sup>7</sup>University of Liverpool, Liverpool, United Kingdom; <sup>8</sup>AstraZeneca, Gothenburg, Sweden

**Funding Acknowledgement:** AstraZeneca, Deutsche Forschungsgemeinschaft (ZE 1109/1-1)

**Background:** Renal dysfunction including both reduced estimated glomerular filtration rate (eGFR) and the presence of albuminuria have each been shown to predict cardiovascular (CV) outcomes. Sodium glucose co-transporter 2 inhibitors (SGLT2i), which promote glucose excretion in the kidneys, reduce CV events and hospitalizations for heart failure (HHF) in patients with type 2 diabetes mellitus (T2DM).

**Purpose:** To analyze the CV efficacy of dapagliflozin according to baseline renal function and albuminuria status in DECLARE-TIMI 58.

**Methods:** The DECLARE-TIMI 58 trial compared dapagliflozin vs. placebo in 17,160 patients with T2DM and a creatinine clearance >60 ml/min/1.73m<sup>2</sup> at enrollment. The dual primary endpoints were CV death/HHF and MACE (MI, stroke, CV death). We categorized patients according baseline eGFR [ $<60$  vs.  $\geq 60$  ml/min/1.73m<sup>2</sup> according to the CKD-EPI formula] and urinary albumin:creatinine ratio (UACR) [ $<30$  vs.  $\geq 30$  mg/g]. Cox regression models with interaction testing were applied. The Gail-Simon test was used to test for interaction of the absolute risk differences.

**Results:** In total, 5198 (30.3%) patients had albuminuria (UACR 30–300: n=4029; UACR >300: n=1169) and 1265 (7.4%) had an eGFR <60

ml/min/1.73m<sup>2</sup>. Accordingly, 10958 (63.9%) patients had no manifestation of CKD, 5367 (31.3%) had either an eGFR <60 ml/min/1.73m<sup>2</sup> or albuminuria, and 548 (3.2%) patients had both manifestations. Patients with more abnormal markers had higher event rates for CV death/HHF (KM event rates at 4 years of 3.9%, 8.3%, 17.4%) and MACE (7.5%, 11.7%, and 18.9%) for no, 1, or 2 markers of CKD, respectively. The relative risk reductions for CV death/HHF and MACE were generally consistent across the subgroups (both P-interaction >0.29), though numerically greatest (42%) in patients with reduced eGFR and albuminuria. However, the absolute risk difference increased substantially in patients with greater kidney damage (absolute risk difference of CV death/HHF: –0.5%, –1.0%, and –8.3%, respectively; P-INT for ARD 0.002; Figure). See figure for MACE and component outcomes.

**Conclusions:** Patients with baseline renal disease had higher rates of adverse CV outcomes. Dapagliflozin reduced events with generally consistent relative risk, but reduced the absolute risk of CVD/HHF by the greatest amount in patients with kidney disease evidenced by both reduced eGFR and albuminuria.

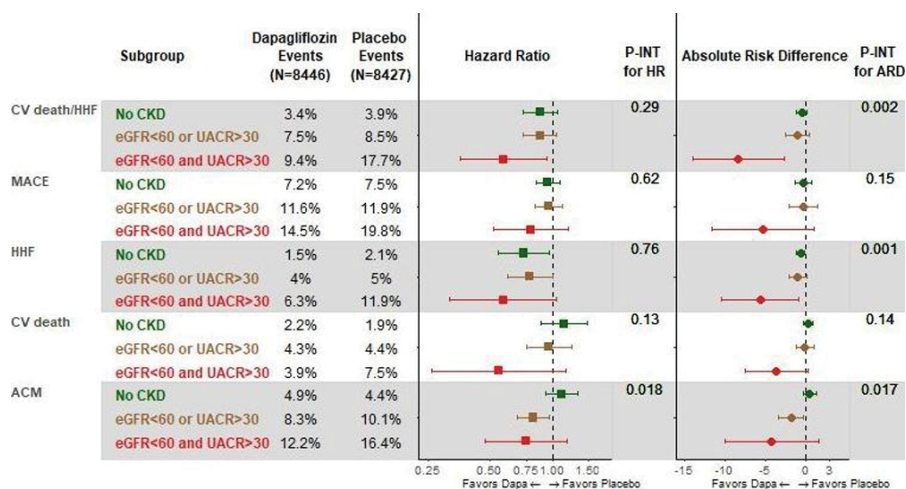

Source: http://academic.oup.com/eurheartj/article-pdf/40/Supplement_1/ehz747.0052/30196860/ehz747.0052.pdf
